# Supplementary material for: Functionalized MIL-125(Ti)-based high-performance triboelectric nanogenerators for hygiene monitoring
Source: Royal Society of Chemistry journal article supplement (doi:10.1039/d5ma00283d), 2025-01-01
Supplement: d5ma00283d7.pdf [file d5ma00283d7.pdf]

## Supplementary Information

### **Functionalized MIL-125(Ti) Based High-Performance Triboelectric Nanogenerators for Hygiene Monitoring**

Anjaly Babu<sup>1</sup>, Navaneeth Madathil<sup>1</sup>, Rakesh Kumar Rajaboina<sup>1</sup>, Hitesh Borkar<sup>1</sup>, Kamakshaiah Charyulu Devarayapalli<sup>2</sup>,  
Yogendra Kumar Mishra<sup>3</sup>, Sugato Hajra<sup>4</sup>, Hoe Joon Kim<sup>4</sup>, Uday Kumar Khanapuram<sup>1\*</sup>, Dae Sung Lee<sup>2\*</sup>

<sup>1</sup>Department of Physics, Energy Materials and Devices (EMD) Lab, National Institute of Technology-Warangal-506004, India.

<sup>2</sup>Department of Environmental Engineering, Kyungpook National University, Buk-gu, Daegu 41566, Republic of Korea.

<sup>3</sup>Smart Materials, NanoSYD, Mads Clausen Institute, University of Southern Denmark, Alsion 2, 6400, Sønderborg, Denmark

<sup>4</sup>Department of Robotics and Mechatronics Engineering, Daegu Gyeongbuk Institute of Science and Technology, Daegu 42988, South Korea.

#### **SI 1: Fabrication of TENG device**

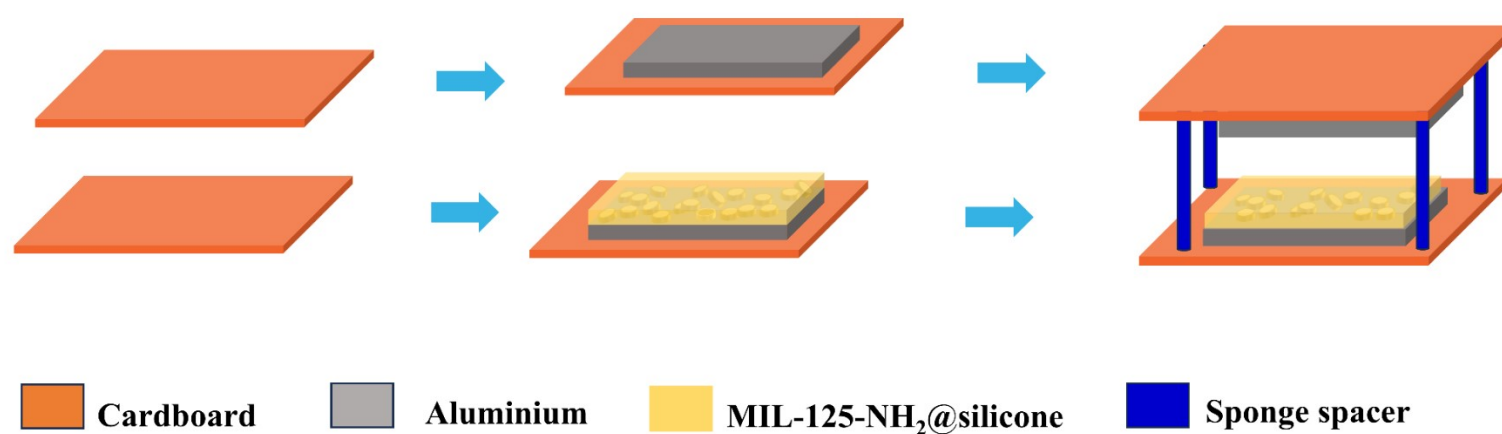

**Figure S1:** The detailed fabrication steps for the TENG device.

SI 2- UV visible absorption spectra of prepared MIL-125

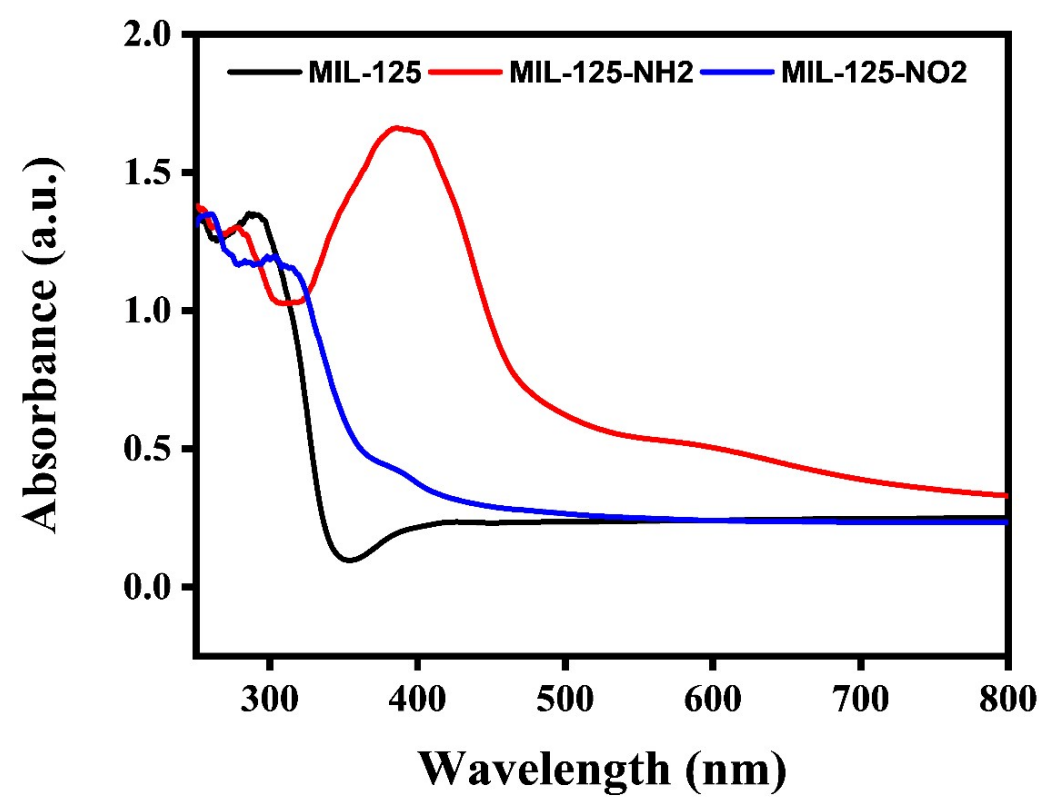

Figure S2: Absorption spectra of MIL-125 and its functional derivatives.

SI 3- FESEM Studies

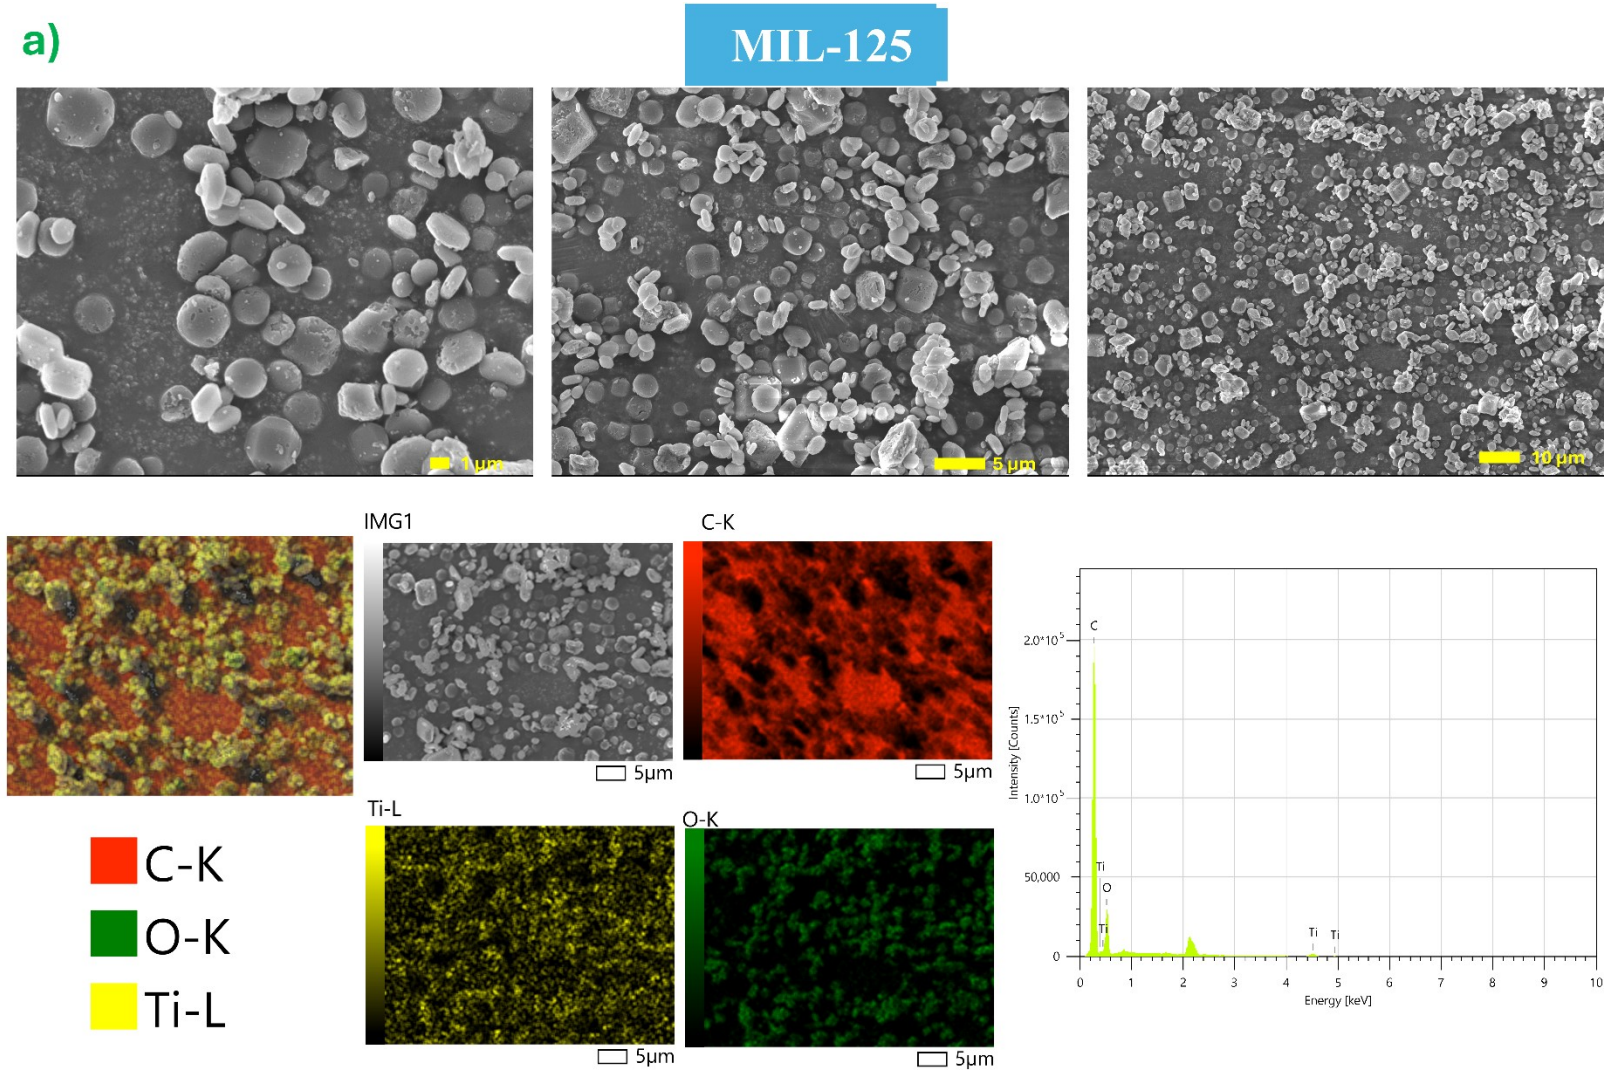



b)

MIL-125-NO<sub>2</sub>

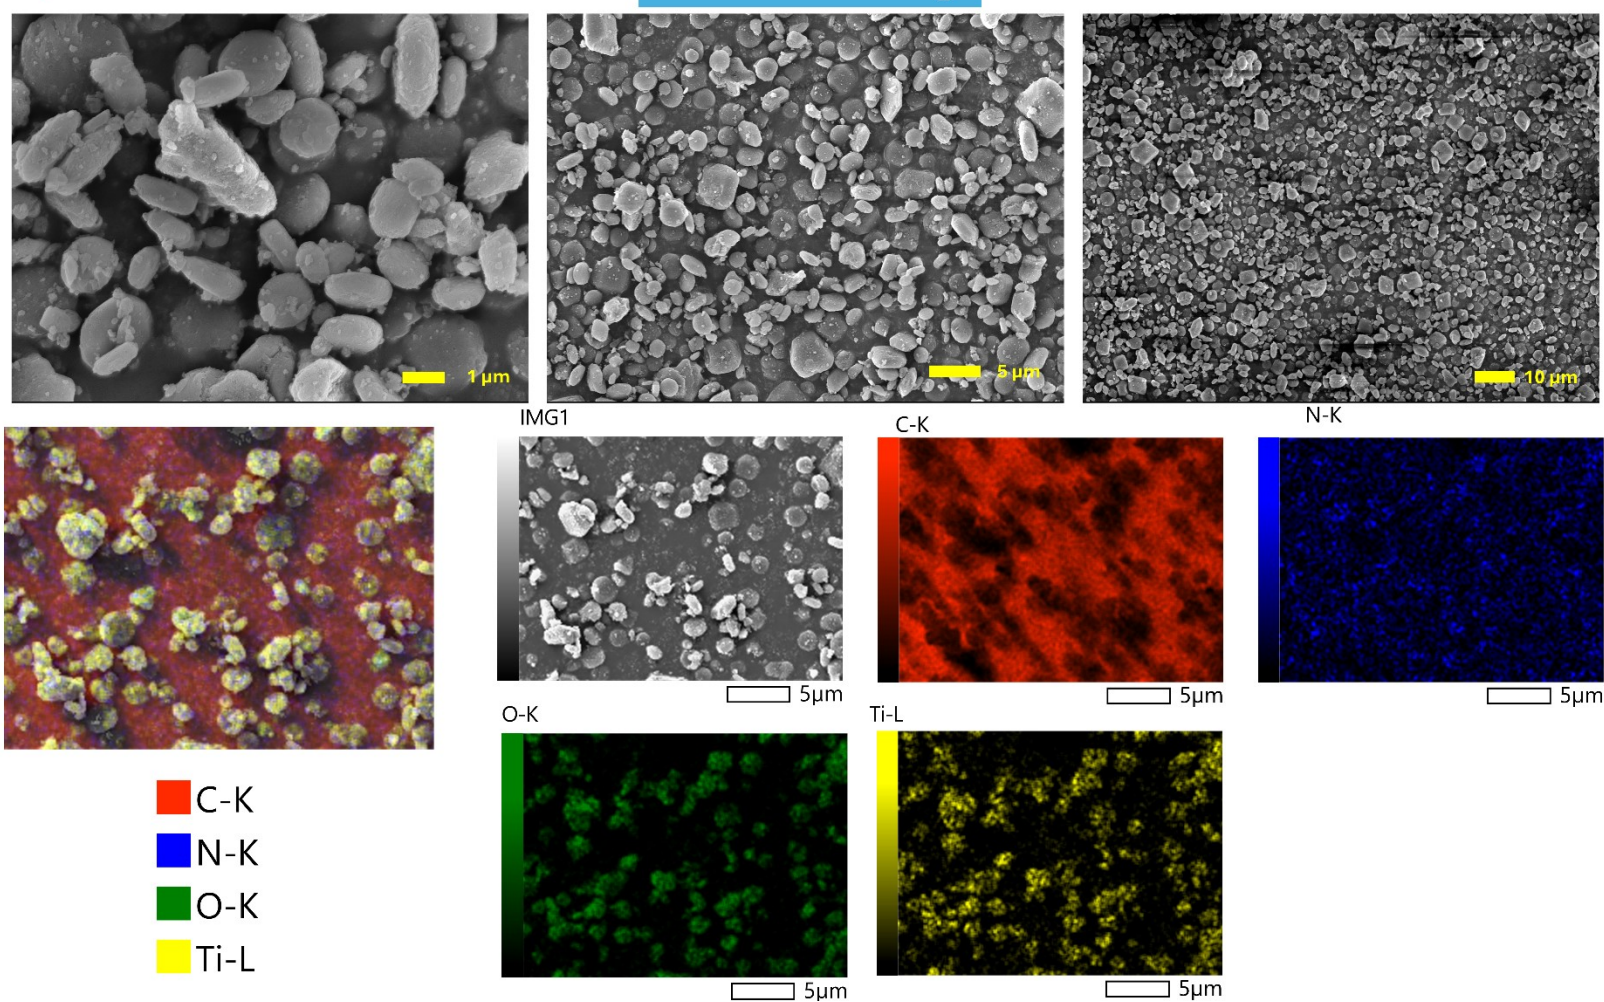

c)

MIL-125-NH<sub>2</sub>

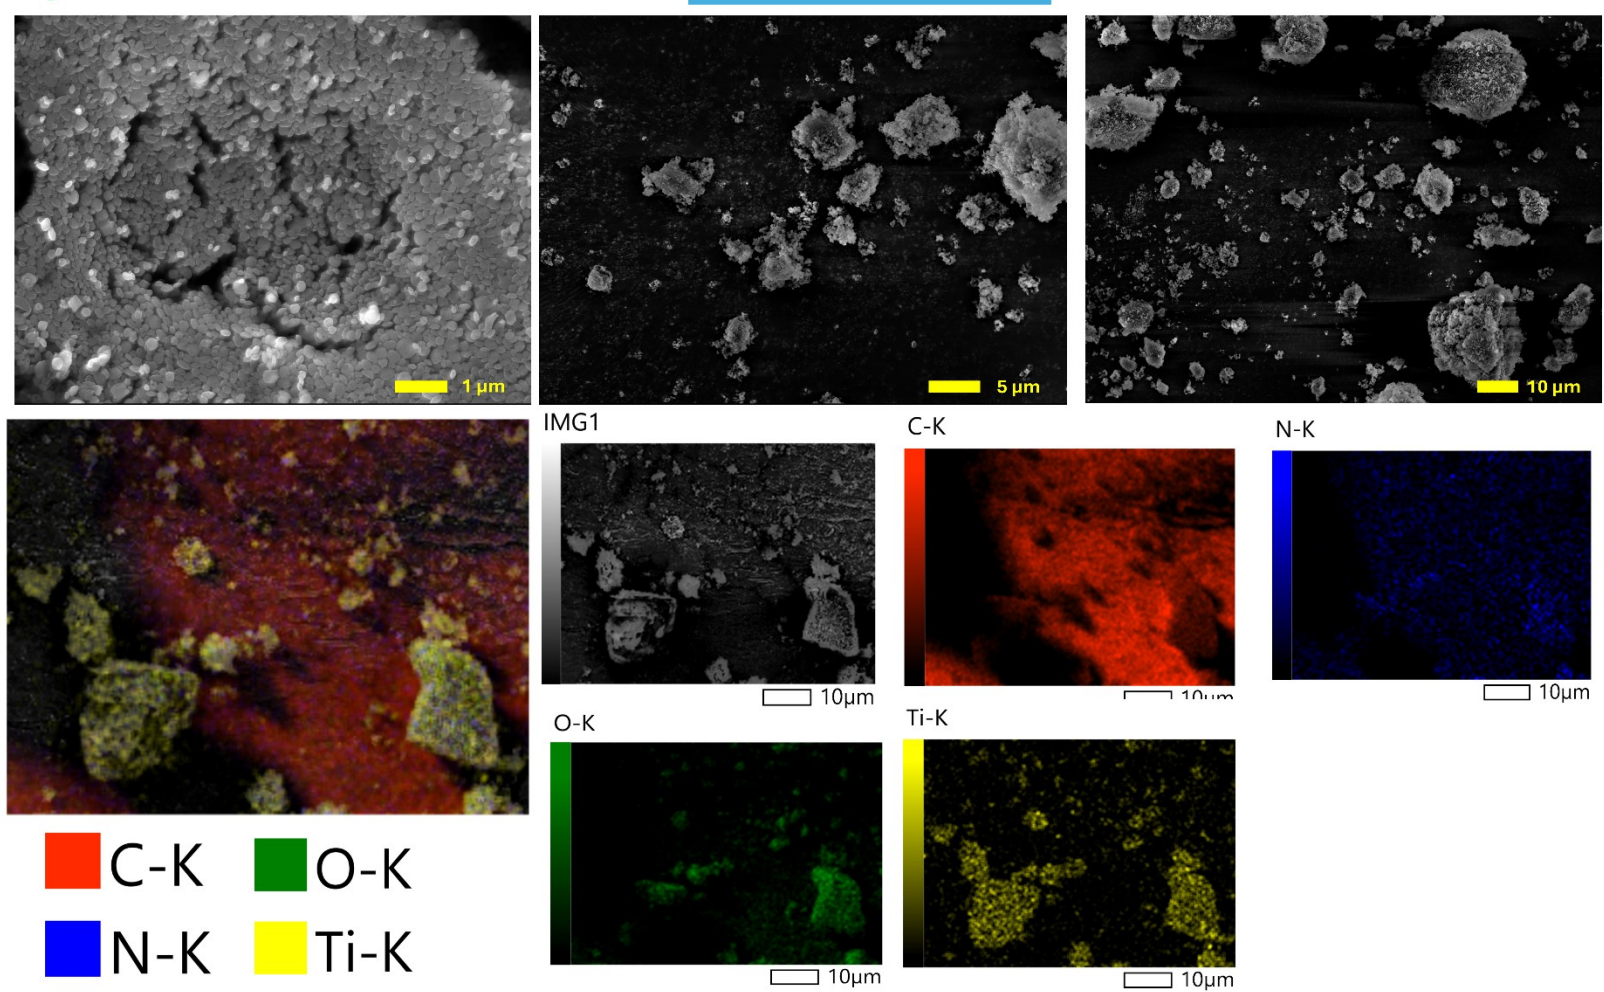

**Figure S3:** FESEM and EDAX of (a) MIL-125(Ti), (b) MIL-125-NO<sub>2</sub>, and (c) MIL-125-NH<sub>2</sub>.



**SI 4:**

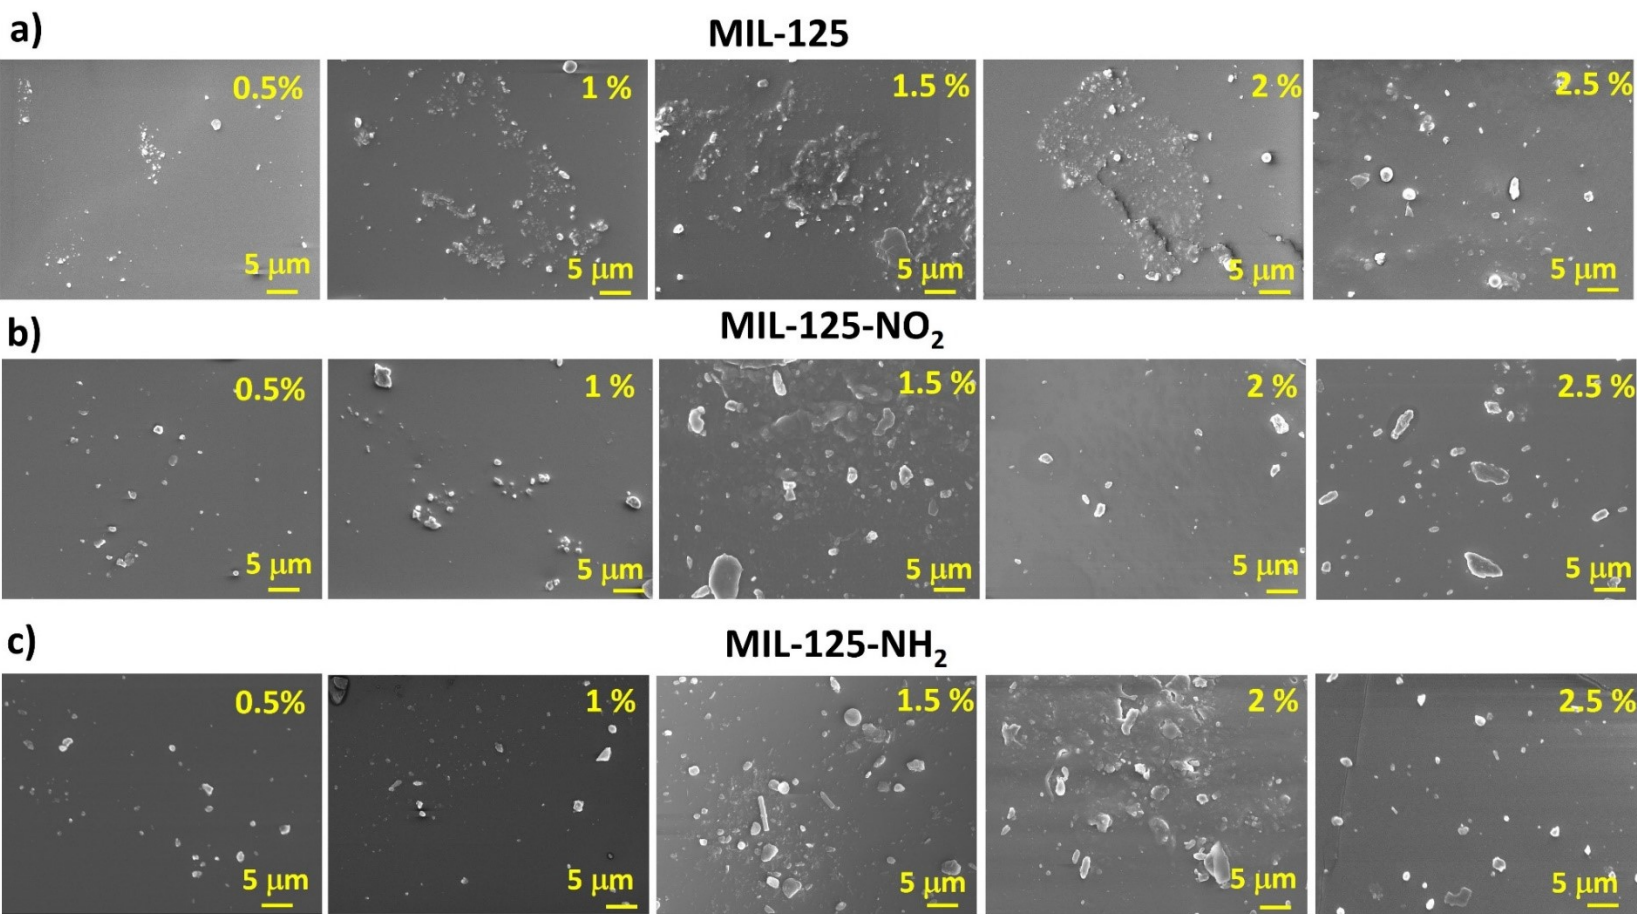

**Figure S4.** FESEM images of MIL-125(Ti)-X@Silicone composite films at various concentrations ranging from 0.5% to 2.5%: (a) MIL-125; (b) MIL-125-NO<sub>2</sub>; (c) MIL-125-NH<sub>2</sub>.

**SI 5:**

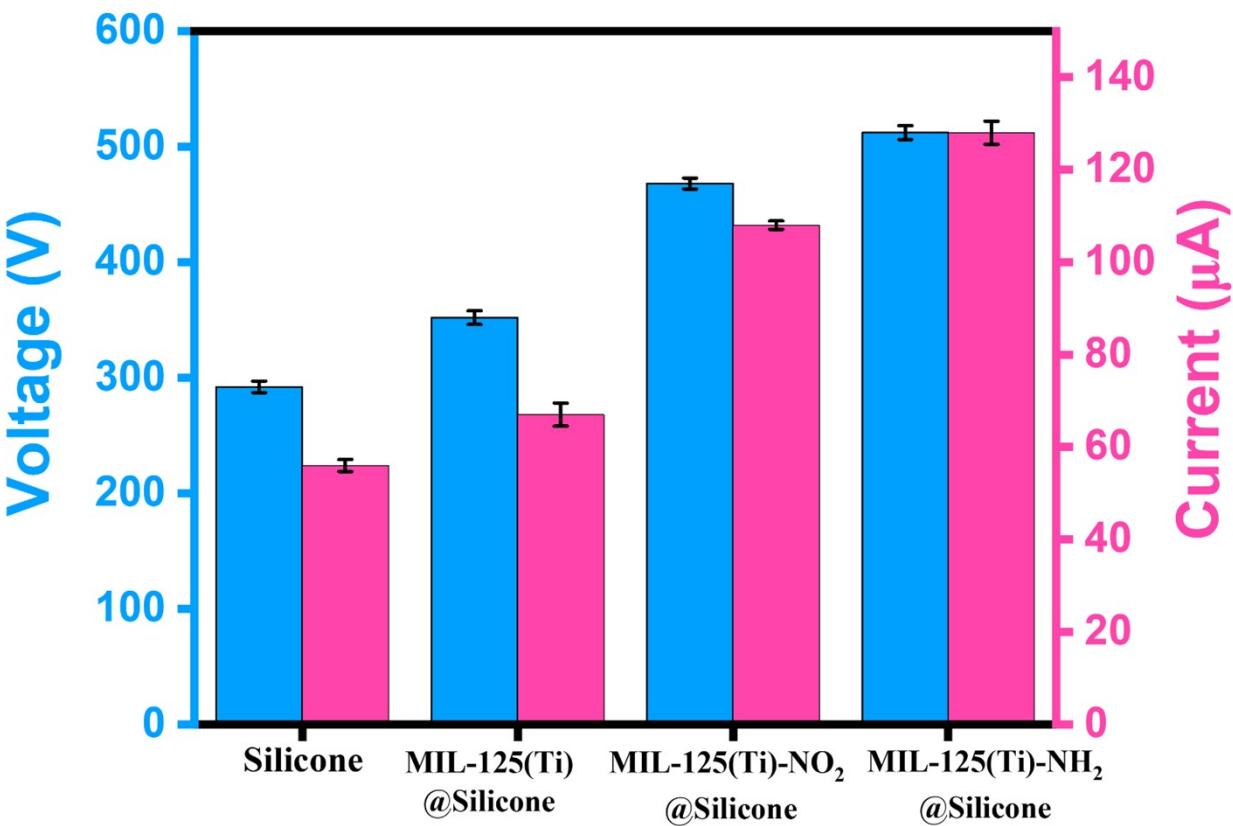

**Figure S5:** Comparison of TENG device output performances for silicone, MIL-125(Ti)@Silicone, functionalised composite films MIL-125(Ti)-NO<sub>2</sub>@Silicone and MIL-125(Ti)-NH<sub>2</sub>@Silicone.

**SI 6:**

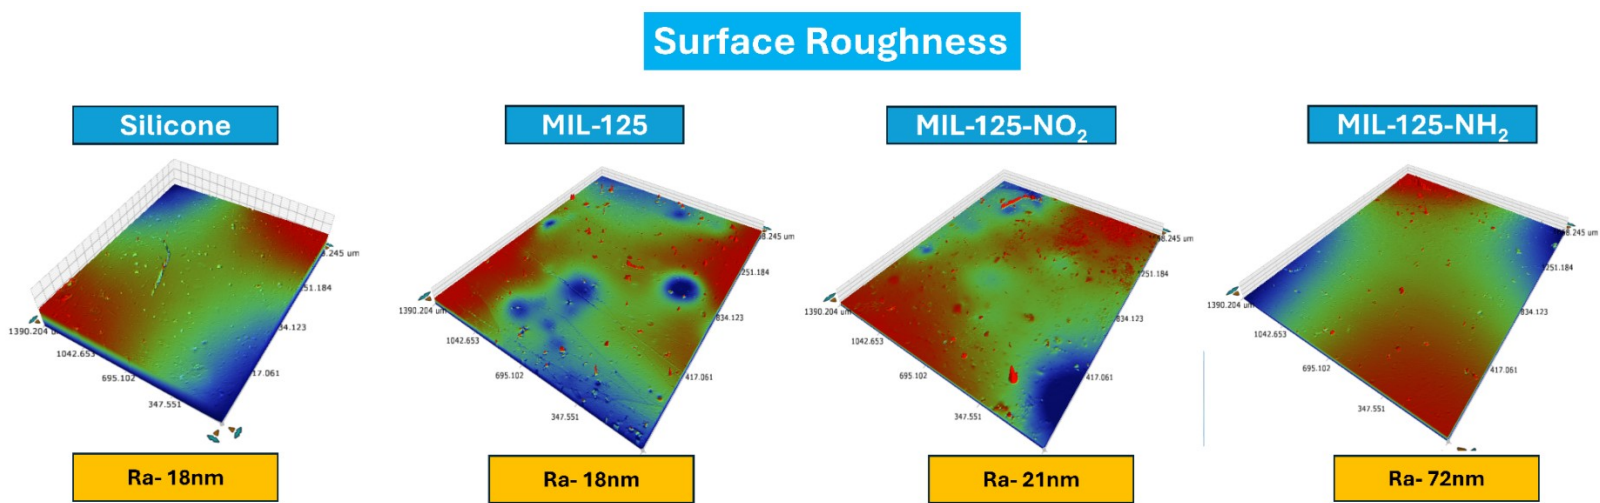

**Figure S6:** Surface roughness measurements of silicone, MIL-125(Ti), and functionalized composite films MIL-125(Ti)-NO<sub>2</sub> and MIL-125(Ti)-NH<sub>2</sub>.
